# Supplementary material for: Effect of electron-donor ancillary ligands on the heteroleptic ruthenium complexes: synthesis, characterization, and application in high-performance dye-sensitized solar cells
Source: Royal Society of Chemistry journal article supplement (doi:10.1039/c6cp00541a), 2016-01-01
Supplement: c6cp00541a1.pdf [file c6cp00541a1.pdf]

## Supplementary information

### Effect of electron-donor ancillary ligands on the heteroleptic ruthenium complexes: synthesis, characterization, and application to high performance dye-sensitized solar cells

Wang-Chao Chen<sup>ab</sup>, Fan-Tai Kong<sup>\*a</sup>, Xue-Peng Liu<sup>ab</sup>, Fu-Ling Guo<sup>a</sup>, Li Zhou<sup>a</sup>, Yong Ding<sup>a</sup>, Zhao-Qian Li<sup>a</sup>, and Song-Yuan Dai<sup>\*ca</sup>

<sup>a</sup> Key Laboratory of Novel Thin Film Solar Cells, Institute of Applied Technology, Hefei Institutes of Physical Science, Chinese Academy of Sciences, Hefei 230031, P. R. China

<sup>b</sup> University of Science and Technology of China, Hefei 230026, P. R. China

<sup>c</sup> Beijing Key Laboratory of Novel Thin Film Solar Cells, North China Electric Power University, Beijing 102206, P. R. China

\*Corresponding authors:

kongfantai@163.com (FT Kong) (+86 55165593222);

sydai@ncepu.edu.cn (SY Dai) (+86 1061772268).

**Synthesis of 4,4'-bis(4-methylthiophenyl)-2,2'-bipyridine (Ligand 1):** 4,4'-dibromo-2,2'-bipyridine (157 mg, 0.5 mmol), (4-methylthiophenyl) boronic acid (184.8 mg, 1.1 mmol), K<sub>2</sub>CO<sub>3</sub> (1.03 g, 7.5 mmol) and Pd(PPh<sub>3</sub>)<sub>4</sub> (45 mg, 0.04 mmol) were dissolved in DMF/H<sub>2</sub>O (9:1, v/v, 50 mL). The mixture was refluxed under Ar for 24 h. The organic layers, extracted with CHCl<sub>3</sub> for three times, were washed with brine, dried with anhydrous Na<sub>2</sub>SO<sub>4</sub>. After the solvent was evaporated, the crude product was purified by column chromatography (CH<sub>2</sub>Cl<sub>2</sub>/CH<sub>3</sub>OH, 25:1, v/v) obtained the target

compound Ligand-1 as a litter yellow powder. (84 mg, yield 42%).  $^1\text{H NMR}$  (400 MHz,  $\text{CDCl}_3$ ):  $\delta$  /ppm: 9.37 (s, 2H), 8.89 (d, 2H), 8.02 (s, 4H), 7.96 (s, 2H), 7.47 (dd, 4H), 2.59 (s, 6H).

***Synthesis of 4,4'-bis(4-methoxyphenyl)-2,2'-bipyridine (Ligand 2):*** A mixture of compound 4,4'-dibromo-2,2'-bipyridine (157 mg, 0.5 mmol), (4-methoxyphenyl) boronic acid (167.2 mg, 1.1 mmol) and  $\text{Pd}(\text{PPh}_3)_4$  (45 mg, 0.04 mmol) were dissolved in 1,4-dioxane (40 mL) under magnetic stirring for half hours. Then,  $\text{K}_2\text{CO}_3$  (1.03 g, 7.5 mmol) in 5mL deionized water was added and the mixture was refluxed under Ar for 24 h. The organic layer, after cooled to room temperature, was extracted with  $\text{CH}_2\text{Cl}_2$  for three times. The combined organic layers were washed with brine, dried with anhydrous  $\text{Na}_2\text{SO}_4$ . The solvent was evaporated under reduced pressure. The purification of remaining crude product by column chromatography ( $\text{CH}_2\text{Cl}_2/\text{CH}_3\text{OH}$ , 50:1, v/v) obtained Ligand-2 as a white powder. (105 mg, yield 57 %).  $^1\text{H NMR}$  (400 MHz,  $\text{CDCl}_3$ ):  $\delta$  /ppm: 8.76 (m, 4H), 7.83-7.82 (m, 4H), 7.60 (s, 2H), 7.09-7.06 (dd, 4H), 3.92 (s, 6H).

***Synthesis of 4,4'-bis(3,4-Methylenedioxyphenyl)-2,2'-bipyridine (Ligand 3):*** 4,4'-dibromo-2,2'-bipyridine (157 mg, 0.5 mmol), (3, 4-Methylenedioxyphenyl) boronic acid (182.5 mg, 1.1 mmol),  $\text{K}_2\text{CO}_3$  (1.03 g, 7.5 mmol) and  $\text{Pd}(\text{PPh}_3)_4$  (45 mg, 0.04 mmol) were dissolved in toluene/EtOH/ $\text{H}_2\text{O}$  (2:1:1, v/v/v, 40 mL). The mixture was refluxed under Ar for 24 h. The organic layers, extracted with  $\text{CHCl}_3$  for three times, were washed with brine, dried with anhydrous  $\text{Na}_2\text{SO}_4$ . The solvent was removed on a rotary evaporator under vacuum and the crude product was purified by column

chromatography (CH<sub>2</sub>Cl<sub>2</sub>/CH<sub>3</sub>OH, 200:1, v/v) obtained the target compound Ligand-3 as a yellow powder. (93 mg, yield 47 %). <sup>1</sup>H NMR (400 MHz, CDCl<sub>3</sub>): δ /ppm: 9.18 (s, 2H), 8.89 (s, 2H), 8.00 (s, 2H), 7.82 (d, 2H), 7.63 (d, 2H), 7.10 (d, 2H), 6.15 (s, 4H).

**Synthesis of RC-15 (Ru[(dcbpy)(Ligand-1)(NCS)<sub>2</sub>]):** Dichloro(p-cymene) ruthenium(II) dimer (153 mg, 0.25 mmol) and Ligand-1 (184 mg, 0.50 mmol) were dissolved in DMF. The mixture was stirred at 90 °C for 4 h under Ar in the dark. Subsequently, 4,4'-dicarboxylic acid-2,2'-bipyridine (122.2 mg, 0.50 mmol) was added into the flask and the reaction mixture was heated up to 140 °C for 6 h. Next, an excess of potassium thiocyanate (1.13 g, 15 mmol) was added to the resulting dark solution and it was continued for 6 h at 140 °C. Then the reaction mixture was cooled to room temperature overnight. After the solvent was evaporated under vacuum, H<sub>2</sub>O was added to get the precipitate. The solid was collected on a sintered glass crucible by suction filtration, washed intensively with diethyl ether, and dried under vacuum. The crude product was dissolved in basic methanol (with NaOH) and purified on a Sephadex LH-20 column with MeOH as eluent. The collected main band was collected and slowly dropped with an acidic methanol solution to pH 5.9. Yield (3×): 43%. The precipitate was collected on a sintered glass crucible by suction filtration and dried in air. <sup>1</sup>H NMR(400 MHz, DMSO-D<sub>6</sub>): δ /ppm: 9.27 (m, 2H), 9.12 (m, 2H), 8.39-8.35 (d, 2H), 8.22 (d, 2H), 7.93 (m, 4H), 7.20 (d, 2H), 7.56 (m, 4H), 7.43 (d, 2H), 2.62 (s, 6H). MALDI-TOF-MS (m/z): calcd for (M-Na)<sup>-</sup> C<sub>38</sub>H<sub>28</sub>N<sub>6</sub>O<sub>4</sub>RuS<sub>4</sub>: 862.1098, found: 862.1112.

**Synthesis of RC-16 (Ru[(dcbpy)(Ligand-2)(NCS)<sub>2</sub>]):** Dichloro(p-cymene)

ruthenium(II) dimer (153 mg, 0.25 mmol) and Ligand-2 (200 mg, 0.50 mmol) were dissolved in DMF. The mixture was stirred at 90 °C for 4 h under Ar in the dark. Subsequently, 4,4'-dicarboxylic acid-2,2'-bipyridine (122.2 mg, 0.50 mmol) was added into the flask and the reaction mixture was heated up to 140 °C for 6 h. Next, an excess of potassium thiocyanate (1.13 g, 15 mmol) was added to the resulting dark solution and it was continued for 6 h at 140 °C. Then the reaction mixture was cooled to room temperature overnight. After the solvent was evaporated under vacuum, H<sub>2</sub>O was added to get the precipitate. The solid was collected on a sintered glass crucible by suction filtration, washed intensively with diethyl ether, and dried under vacuum. The column purification was done with the same procedures described above for **RC-15**. After collecting the main band, the precipitate was concentrated on a sintered glass crucible by suction filtration and dried in air. Yield with Sephadex LH-20 column purification (3×): 47%. <sup>1</sup>H NMR(400 MHz, DMSO-D<sub>6</sub>): δ/ppm: 9.52 (m, 2H), 9.32-9.02 (m, 4H), 8.49-8.37 (m, 2H), 8.24 (m, 2H), 8.20-7.95 (m, 4H), 7.69-7.40 (m, 2H), 7.25-7.12 (dd, 4H), 3.90 (s, 3H), 3.84 (s, 3H). MALDI-TOF-MS (m/z): calcd for (M-NCS)<sup>+</sup> C<sub>38</sub>H<sub>28</sub>N<sub>6</sub>O<sub>6</sub>RuS<sub>2</sub>: 772.3704, found: 772.3709.

**Synthesis of RC-22 (Ru[(dcbpy)(Ligand-3)(NCS)<sub>2</sub>]):** Dichloro(p-cymene) ruthenium(II) dimer (153 mg, 0.25 mmol) and Ligand-3 (240 mg, 0.50 mmol) were dissolved in DMF. The mixture was stirred at 90 °C for 4 h under Ar in the dark. Subsequently, 4,4'-dicarboxylic acid-2,2'-bipyridine (122.2 mg, 0.50 mmol) was added into the flask and the reaction mixture was heated up to 140 °C for 6 h. Then, an excess of potassium thiocyanate (1.13 g, 15 mmol) was added to the resulting dark solution

and it was continued for 6 h at 140 °C. Then the reaction mixture was cooled to room temperature overnight. After the solvent was evaporated under vacuum, H<sub>2</sub>O was added to get the precipitate. The solid was collected on a sintered glass crucible by suction filtration, washed intensively with diethyl ether, and dried under vacuum. The column purification was done with the same procedures described above for **RC-15**. After collecting the main band, the precipitate was concentrated on a sintered glass crucible by suction filtration and dried in air. Yield with Sephadex LH-20 column purification (3×): 41%. <sup>1</sup>H NMR(400 MHz, DMSO-D<sub>6</sub>):δ/ppm: 9.49-8.99 (m, 6H), 8.34 (m, 2H), 7.91 (m, 2H), 7.80-7.62 (m, 4H), 7.50-7.47 (m, 2H), 7.25-7.12 (dd, 2H), 6.22-6.13 (d, 4H). MALDI-TOF-MS (m/z): calcd for (M-Na)- C<sub>38</sub>H<sub>28</sub>N<sub>6</sub>O<sub>6</sub>RuS<sub>2</sub>: 858.2941, found: 858.2999
